# Supplementary material
Source: publisher site journal article supplement (https://www.kjim.org/upload/media/kjim-2021-475-suppl7.pdf)
Supplement: Supplementary file 1 [file kjim-2021-475-suppl7.pdf]

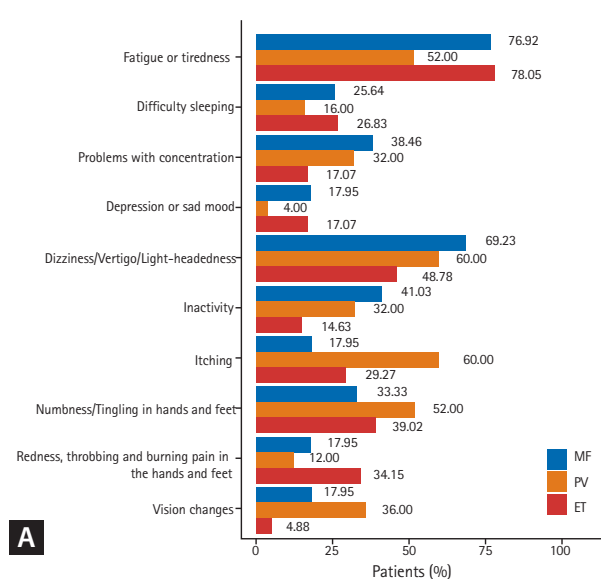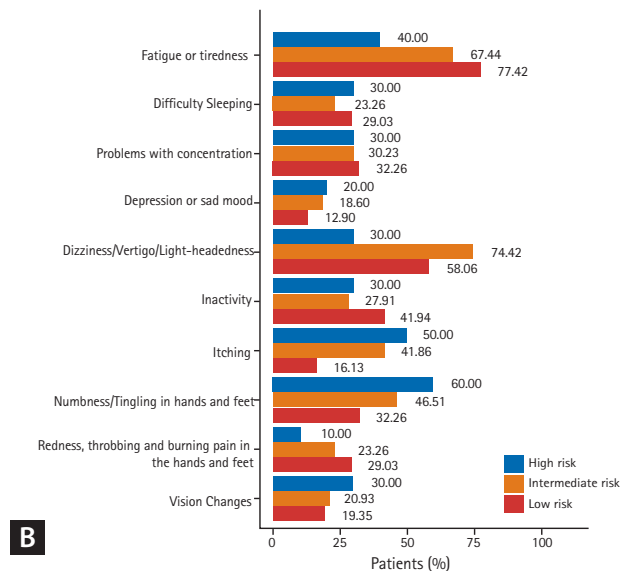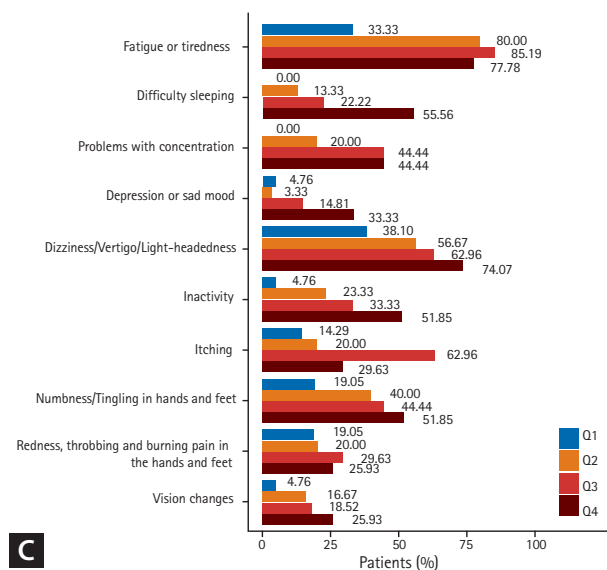

**Supplementary Figure 2.** Most often experienced symptoms within 12 months reported by patients (A) according to myeloproliferative neoplasm subgroup, (B) according to risk score, (C) according to symptom severity. MF, myelofibrosis; PV, polycythemia vera; ET, essential thrombocythemia; Q, quartile.
